# Supplementary material for: High mitochondrial diversity of domesticated goats persisted among Bronze and Iron Age pastoralists in the Inner Asian Mountain Corridor
Source: PLoS One. 2020 May 21;15(5):e0233333. doi: 10.1371/journal.pone.0233333 (PMC7241827; doi:10.1371/journal.pone.0233333)
Supplement: S3 Table — (XLSX) [file pone.0233333.s004.xlsx]

## Sheet: Table S3
Primer Pair	Primer ID	Sequence (5’ to 3’ direction)	Taxon	Locus	Amplicon length	Annealing Temperature	Reference
G1	CAP-FII	GATCTTCCYCATGCATATAAGCA	Capra spp.	HVRI	130 bp	55°C	[56]
	CAP-RII	CGGGTTGCTGGTTTCAC	Capra spp.	HVRI			[56]
G2	CapFC1	CTCTGTAACTCACATTTGTC	Bovidae	Cytb	110 bp	50°C	[56]
	CapRB1b	GTTTCATGTTTCTAGAAAGGT	Bovidae	Cytb			[56]
G3	CAP-FII	GATCTTCCYCATGCATATAAGCA	Capra spp.	HVRI	193bp	55°C	[56]
	CAP-RIII	GATAAAGTTCATTAAATAGCTAC	Capra spp.	HVRI			[59]
G4	CSib-FI	AACATGCGTATCCCGTCCAC	Capra sibirica	HVRI	120 bp	60°C	This study
	CSib-RI	GGCCCTGAAGAAAGAACCAG	Capra sibirica	HVRI			This study
